# Supplementary material
Source: Springer Nature journal article supplement (https://www.springermedizin.de/resource/supplementary/13014_2013_900_MOESM1_ESM.pdf/9634390)
Supplement: MOESM1 [file 9634390]

**Target  
Contouring**

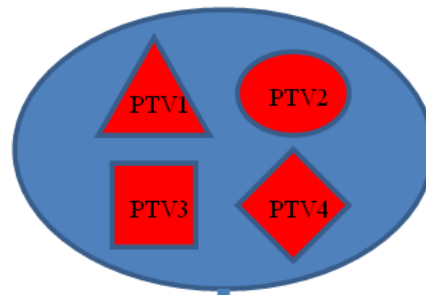

**Planning**

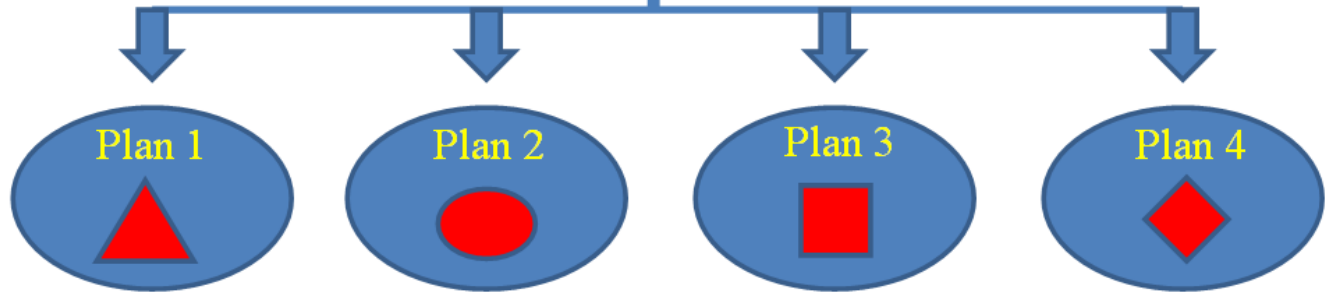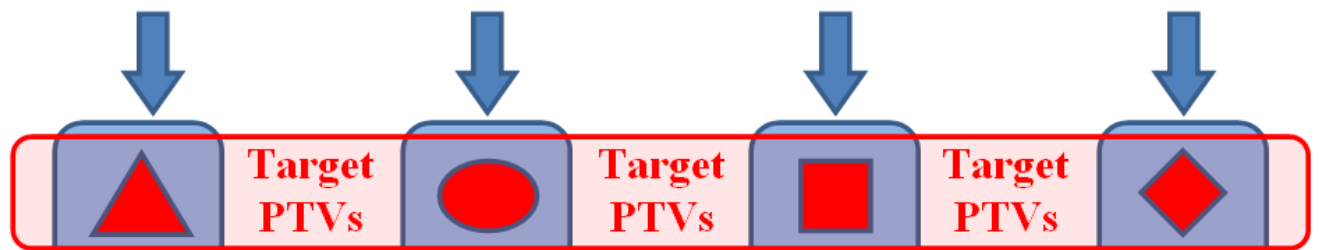

**DVH  
evaluation**

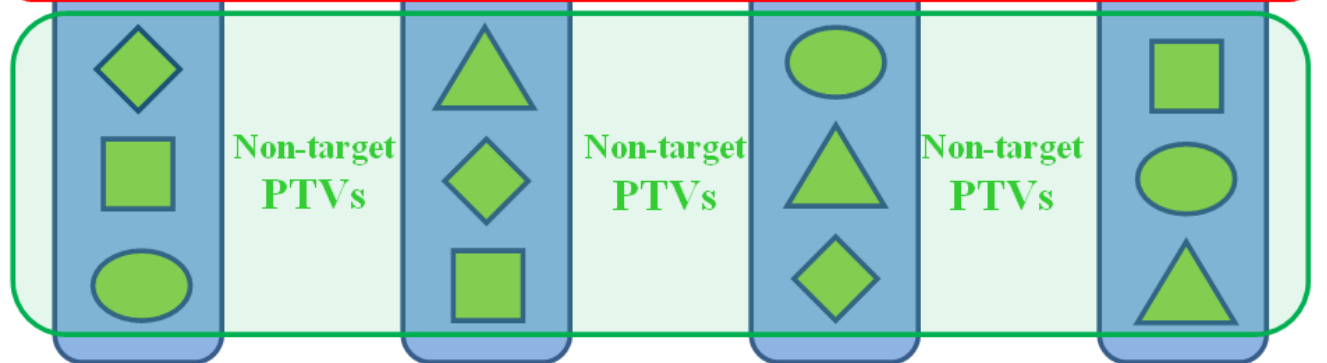

**Figure 1:** A schematic representation of the PTV analysis is presented: the four physicians defined four different targets on the same patient, for each patient four plans were optimized on the different PTVs. During the DVH evaluation the PTV on which the target was optimized was called *target PTV*, while the other targets present on the same CT series were called *non-target PTVs*. Obviously all targets were both *target* and *non-target PTVs* according to the plan considered. This procedure was performed for each patient and for the two planning techniques (3DCRT and RA) before and after the introduction of the guidelines.
